# Supplementary material for: Prognostic significance of EGFR, AREG and EREG amplification and gene expression in muscle invasive bladder cancer
Source: Front Oncol. 2024 May 28;14:1370303. doi: 10.3389/fonc.2024.1370303 (PMC11168109; doi:10.3389/fonc.2024.1370303)
Supplement: Supplementary file 4 [file Table_4.xlsx]

## Sheet: Sheet1
Sample name	exclusion	survival ≤3 months	Sex	Age	age 70	TMN stage	T	T stage individual stage	T stage	N	N stage	M	Grade	Grade_low_high	CSS classification	CSS (0=dead, 1=alive)	OS classification	OS (0=death, 1=alive)	survival Month	EGFR	AREG	EREG	OS Partition EGFR	OS Partition AREG	OS Partition EREG	CSS Partition EGFR	CSS Partition AREG	CSS Partition EREG
BT001	excluded	>3	M	78	≥70	T1N0M0	1		.	0	N0	0	1	low	.		.		18.17	7.07	7.55	7.45
BT002	excluded	>3	F	54	<70	TaN0M0	0		.	0	N0	0	1	low	.		.		136.97	7.13	7.08	7.51
BT003	excluded	>3	M	37	<70	TaN0M0	0		.	0	N0	0	1	low	.		.		136.37	8.1	6.97	7.42
BT004	excluded	>3	M	72	≥70	T1N0M0	1		.	0	N0	0	1	low	.		.		26.9	8.25	6.94	7.26
BT005	excluded	>3	M	68	<70	T1N0M0	1		.	0	N0	0	1	low	.		.		87.07	8.49	6.93	6.97
BT006	excluded	>3	M	80	≥70	T1N0M0	1		.	0	N0	0	1	low	.		.		15.3	8.54	6.93	7.36
BT007	excluded	>3	M	67	<70	T1N0M0	1		.	0	N0	0	1	low	.		.		18.53	7.91	7.08	7.03
BT008	included	>3	M	58	<70	T2N0M0	2	2	T2	0	N0	0	1	low	alive	1	alive	1	129.93	8.02	7.06	7.39	EGFR<8,81	AREG>=7,03	EREG>=7,36	EGFR>=7,89	AREG>=7,03	EREG>=7,14
BT009	included	>3	F	77	≥70	T3bN0M0	3	3	T3/4	0	N0	0	2	high	dead	0	dead	0	12.57	8.93	7.03	7.39	EGFR>=8,81	AREG>=7,03	EREG>=7,36	EGFR>=7,89	AREG>=7,03	EREG>=7,14
BT010	included	>3	M	64	<70	T3aN0M0	3	3	T3/4	0	N0	0	1	low	alive	1	alive	1	128.97	7.53	7	7.12	EGFR<8,81	AREG<7,03	EREG<7,36	EGFR<7,89	AREG<7,03	EREG<7,14
BT011	excluded	>3	M	63	<70	TaN0M0	0		.	0	N0	0	1	low	.		.		125.03	8.59	6.95	7.33
BT012	excluded	>3	F	56	<70	TaN0M0	0		.	0	N0	0	1	low	.		.		125.27	8.3	7	7.21
BT013	excluded	>3	M	69	<70	T1N0M0	1		.	0	N0	0	1	low	.		.		130.6	8	7.08	7.75
BT014	included	≤3	M	75	≥70	T4N0M0	4	4	T3/4	0	N0	0	1	low	dead	0	dead	0	1.03	8.27	6.82	7.32
BT015	excluded	>3	M	76	≥70	T1N0M0	1		.	0	N0	0	1	low	.		.		129.67	7.83	6.89	7.53
BT016	excluded	>3	M	61	<70	T3aN2M1	3	3	T3/4	2	N+	1	1	low	dead	0	dead	0	16.67	7.58	6.97	7.02
BT017	excluded	>3	M	45	<70	T1N0M0	1		.	0	N0	0	1	low	.		.		127.63	8.17	7.05	7.32
BT018	excluded	>3	M	58	<70	TaN0M0	0		.	0	N0	0	1	low	.		.		124.53	8.44	6.99	7.31
BT019	excluded	>3	F	71	≥70	T4N2M1	4	4	T3/4	2	N+	1	2	high	dead	0	dead	0	3.13	8.47	6.96	7.78
BT020	excluded	>3	M	79	≥70	T1N0M0	1		.	0	N0	0	1	low	.		.		65.93	7.63	7.15	7.26
BT021	excluded	>3	M	75	≥70	T1N0M0	1		.	0	N0	0	1	low	.		.		3.23	7.36	6.9	6.92
BT022	excluded	>3	M	63	<70	T1N0M0	1		.	0	N0	0	1	low	.		.		120.6	7.83	7.03	7.26
BT023	excluded	>3	F	68	<70	T1N0M0	1		.	0	N0	0	1	low	.		.		22.67	8.88	7.18	7.44
BT024	included	>3	M	56	<70	T3aN0M0	3	3	T3/4	0	N0	0	2	high	alive	1	alive	1	120.5	9.34	7.07	8.06	EGFR>=8,81	AREG>=7,03	EREG>=7,36	EGFR>=7,89	AREG>=7,03	EREG>=7,14
BT025	excluded	>3	M	82	≥70	T1N0M0	1		.	0	N0	0	1	low	.		.		50.43	8.11	7.02	7.3
BT026	included	>3	M	38	<70	T2N0M0	2	2	T2	0	N0	0	1	low	dead	0	dead	0	66.3	7.73	6.97	7.36	EGFR<8,81	AREG<7,03	EREG>=7,36	EGFR<7,89	AREG<7,03	EREG>=7,14
BT027	excluded	>3	M	55	<70	TaN0M0	0		.	0	N0	0	1	low	.		.		120.17	7.51	6.89	7.43
BT028	excluded	>3	M	53	<70	T1N0M0	1		.	0	N0	0	1	low	.		.		120.6	8.23	7	7.21
BT029	included	>3	M	64	<70	T3bN0M0	3	3	T3/4	0	N0	0	2	high	dead	0	dead	0	14.57	8.19	7.02	7.03	EGFR<8,81	AREG<7,03	EREG<7,36	EGFR>=7,89	AREG<7,03	EREG<7,14
BT030	included	>3	M	68	<70	T3aN0M0	3	3	T3/4	0	N0	0	2	high	alive	1	alive	1	115.83	7.89	6.98	7.32	EGFR<8,81	AREG<7,03	EREG<7,36	EGFR>=7,89	AREG<7,03	EREG>=7,14
BT031	excluded	>3	M	65	<70	TaN0M0	0		.	0	N0	0	1	low	.		.		106.6	7.96	7.17	7.5
BT032	included	>3	F	65	<70	T2N0M0	2	2	T2	0	N0	0	2	high	alive	1	alive	1	121.2	8.28	7.02	7.35	EGFR<8,81	AREG<7,03	EREG<7,36	EGFR>=7,89	AREG<7,03	EREG>=7,14
BT033	excluded	>3	M	74	≥70	T1N0M0	1		.	0	N0	0	1	low	.		.		98	7.73	6.85	7.12
BT034	excluded	>3	M	67	<70	T1N0M0	1		.	0	N0	0	1	low	.		.		67.03	8.48	7.07	7.11
BT035	excluded	>3	M	61	<70	TaN0M0	0		.	0	N0	0	1	low	.		.		99.73	8.3	6.96	7.31
BT036	excluded	>3	M	78	≥70	TaN0M0	0		.	0	N0	0	1	low	.		.		50.3	8.31	7.14	7.23
BT037	excluded	>3	M	52	<70	T1N0M0	1		.	0	N0	0	2	high	.		.		98.23	8.84	7.07	7.43
BT038	excluded	>3	M	65	<70	T1N0M0	1		.	0	N0	0	1	low	.		.		106.03	8.02	7	7.25
BT039	excluded	>3	M	69	<70	T1N0M0	1		.	0	N0	0	1	low	.		.		95.3	7.82	7.03	7.03
BT040	excluded	>3	M	64	<70	TaN0M0	0		.	0	N0	0	1	low	.		.		80.43	8.11	7.16	7.29
BT041	excluded	>3	M	69	<70	T1N0M0	1		.	0	N0	0	2	high	.		.		35.7	8.02	7.03	7.38
BT042	excluded	>3	F	75	≥70	T1N0M0	1		.	0	N0	0	2	high	.		.		51.77	7.59	7.1	6.99
BT043	excluded	>3	M	53	<70	T1N0M0	1		.	0	N0	0	1	low	.		.		92.83	8.01	6.81	7.35
BT044	included	>3	M	58	<70	T2N0M0	2	2	T2	0	N0	0	1	low	alive	1	alive	1	90.73	8.66	6.82	7.31	EGFR<8,81	AREG<7,03	EREG<7,36	EGFR>=7,89	AREG<7,03	EREG>=7,14
BT045	excluded	>3	M	35	<70	T1N0M0	1		.	0	N0	0	1	low	.		.		90.47	7.92	6.96	7.05
BT046	excluded	>3	M	43	<70	T1N0M0	1		.	0	N0	0	1	low	.		.		86.07	8.2	7.13	7.42
BT047	excluded	>3	M	66	<70	T1N0M0	1		.	0	N0	0	1	low	.		.		134.97	8.31	7.09	7.76
BT048	excluded	>3	M	83	≥70	T1N0M0	1		.	0	N0	0	1	low	.		.		65.93	7.86	7.12	7.07
BT049	included	>3	M	73	≥70	T3bN0M0	3	3	T3/4	0	N0	0	2	high	dead	0	dead	0	25.83	7.89	7.1	7.32	EGFR<8,81	AREG>=7,03	EREG<7,36	EGFR>=7,89	AREG>=7,03	EREG>=7,14
BT050	included	>3	M	51	<70	T3bN2M0	3	3	T3/4	2	N+	0	2	high	dead	0	dead	0	10.27	8.81	7.16	7.58	EGFR>=8,81	AREG>=7,03	EREG>=7,36	EGFR>=7,89	AREG>=7,03	EREG>=7,14
BT051	excluded	>3	F	88	≥70	T1N0M0	1		.	0	N0	0	2	high	.		.		85.43	7.96	6.99	7.12
BT052	excluded	>3	M	77	≥70	T1N0M0	1		.	0	N0	0	2	high	.		.		3.17	8.03	6.84	7.41
BT053	excluded	>3	M	79	≥70	T1N0M0	1		.	0	N0	0	1	low	.		.		83.63	8.56	6.89	7.42
BT054	excluded	>3	M	79	≥70	T1N0M0	1		.	0	N0	0	1	low	.		.		83.63	8.15	7.14	7.36
BT055	excluded	>3	M	63	<70	T1N0M0	1		.	0	N0	0	1	low	.		.		70.93	8.31	6.94	7.06
BT056	included	>3	M	62	<70	T2N0M0	2	2	T2	0	N0	0	1	low	alive	1	alive	1	81.63	7.75	6.98	7.15	EGFR<8,81	AREG<7,03	EREG<7,36	EGFR<7,89	AREG<7,03	EREG>=7,14
BT057	excluded	>3	M	67	<70	T1N0M0	1		.	0	N0	0	1	low	.		.		80.2	8.2	7	7.21
BT058	excluded	>3	M	73	≥70	T1N0M0	1		.	0	N0	0	2	high	.		.		78.83	7.92	7.01	7.19
BT059	excluded	>3	M	79	≥70	T1N0M0	1		.	0	N0	0	2	high	.		.		78.73	8.61	6.97	7.35
BT060	excluded	>3	M	59	<70	TaN0M0	0		.	0	N0	0	1	low	.		.		70.73	8.64	7.05	7.12
BT061	excluded	>3	M	78	≥70	T2N1M1	2	2	T2	1	N+	1	2	high	dead	0	dead	0	8.7	8	7.08	7.25
BT062	excluded	>3	M	59	<70	T1N0M0	1		.	0	N0	0	1	low	.		.		75.33	7.65	7.12	7.03
BT063	excluded	>3	F	38	<70	T1N0M0	1		.	0	N0	0	1	low	.		.		75.7	7.58	6.94	7
BT064	excluded	>3	M	49	<70	TaN0M0	0		.	0	N0	0	1	low	.		.		75.13	7.1	7.32	6.93
BT065	excluded	>3	M	62	<70	T1N0M0	1		.	0	N0	0	1	low	.		.		75.13	8.44	6.94	7.12
BT066	excluded	>3	M	61	<70	TaN0M0	0		.	0	N0	0	1	low	.		.		74.17	8.37	7.03	7.21
BT067	excluded	>3	M	74	≥70	T1N0M0	1		.	0	N0	0	2	high	.		.		16.23	8.02	6.79	7.39
BT068	included	>3	M	72	≥70	T3bN0M0	3	3	T3/4	0	N0	0	2	high	dead	0	dead	0	15.1	7.83	6.87	7.15	EGFR<8,81	AREG<7,03	EREG<7,36	EGFR<7,89	AREG<7,03	EREG>=7,14
BT069	included	>3	F	60	<70	T2N0M0	2	2	T2	0	N0	0	1	low	dead	0	dead	0	11.23	7.97	7.04	7	EGFR<8,81	AREG>=7,03	EREG<7,36	EGFR>=7,89	AREG>=7,03	EREG<7,14
BT070	included	>3	M	60	<70	T2N0M0	2	2	T2	0	N0	0	2	high	alive	1	alive	1	69.43	7.97	7.04	7	EGFR<8,81	AREG>=7,03	EREG<7,36	EGFR>=7,89	AREG>=7,03	EREG<7,14
BT071	excluded	>3	M	82	≥70	T1N0M0	1		.	0	N0	0	2	high	.		.		25.03	9.16	7.01	7.17
BT072	excluded	>3	M	67	<70	TaN0M0	0		.	0	N0	0	1	low	.		.		67.07	8.15	7.16	7.52
BT073	included	>3	M	64	<70	T2N0M0	2	2	T2	0	N0	0	2	high	alive	1	alive	1	65.23	8.43	7.05	7.4	EGFR<8,81	AREG>=7,03	EREG>=7,36	EGFR>=7,89	AREG>=7,03	EREG>=7,14
BT074	included	>3	M	73	≥70	T4N0M0	4	4	T3/4	0	N0	0	2	high	dead	0	dead	0	11.97	7.37	6.97	7.3	EGFR<8,81	AREG<7,03	EREG<7,36	EGFR<7,89	AREG<7,03	EREG>=7,14
BT075	excluded	>3	M	67	<70	T1N0M0	1		.	0	N0	0	1	low	.		.		62	7.73	6.91	7.11
BT076	excluded	>3	M	77	≥70	T1N0M0	1		.	0	N0	0	1	low	.		.		61.33	8.76	7.09	7.18
BT077	excluded	>3	M	66	<70	T1N0M0	1		.	0	N0	0	2	high	.		.		60.9	7.95	6.92	7.04
BT078	excluded	>3	M	79	≥70	T1N0M0	1		.	0	N0	0	1	low	.		.		60.2	8.76	7.18	7.2
BT079	excluded	>3	M	48	<70	T1N0M0	1		.	0	N0	0	1	low	.		.		59.6	7.95	6.98	7.2
BT080	included	>3	M	76	≥70	T4N0M0	4	4	T3/4	0	N0	0	2	high	dead	0	dead	0	10.4	7.78	6.99	7.19	EGFR<8,81	AREG<7,03	EREG<7,36	EGFR<7,89	AREG<7,03	EREG>=7,14
BT081	excluded	>3	M	66	<70	T1N0M0	1		.	0	N0	0	1	low	.		.		59.87	7.64	7.05	7.4
BT082	excluded	>3	M	67	<70	T1N0M0	1		.	0	N0	0	1	low	.		.		59	8.22	6.95	6.99
BT083	excluded	>3	F	68	<70	T1N0M0	1		.	0	N0	0	1	low	.		.		58.73	8.4	6.93	7.22
BT084	excluded	>3	M	67	<70	T1N0M0	1		.	0	N0	0	1	low	.		.		46.17	8.08	6.92	7.6
BT085	excluded	>3	F	80	≥70	T1N0M0	1		.	0	N0	0	1	low	.		.		58.43	8.32	7.08	7.8
BT086	excluded	>3	M	68	<70	T1N0M0	1		.	0	N0	0	1	low	.		.		58.07	8.1	6.98	7.37
BT087	excluded	>3	F	32	<70	T1N0M0	1		.	0	N0	0	1	low	.		.		57.63	7.69	6.92	7.25
BT088	excluded	>3	M	63	<70	T1N0M0	1		.	0	N0	0	1	low	.		.		36.3	7.71	7.05	7.39
BT089	included	>3	F	80	≥70	T2N0M0	2	2	T2	0	N0	0	2	high	dead	0	alive	1	56.47	7.47	6.96	7.26	EGFR<8,81	AREG<7,03	EREG<7,36	EGFR<7,89	AREG<7,03	EREG>=7,14
BT090	included	>3	M	67	<70	T2N0M0	2	2	T2	0	N0	0	2	high	alive	1	alive	1	55.5	8	7.05	7.24	EGFR<8,81	AREG>=7,03	EREG<7,36	EGFR>=7,89	AREG>=7,03	EREG>=7,14
BT091	excluded	>3	M	37	<70	T1N0M0	1		.	0	N0	0	1	low	.		.		52.97	8.55	7	7.25
BT092	included	>3	M	71	≥70	T3N1M0	3	3	T3/4	1	N+	0	2	high	dead	0	dead	0	11.5	9.04	6.97	7.34	EGFR>=8,81	AREG<7,03	EREG<7,36	EGFR>=7,89	AREG<7,03	EREG>=7,14
BT093	included	>3	M	60	<70	T3N0M0	3	3	T3/4	0	N0	0	2	high	dead	0	dead	0	17.87	8.14	7.02	7.41	EGFR<8,81	AREG<7,03	EREG>=7,36	EGFR>=7,89	AREG<7,03	EREG>=7,14
BT094	excluded	>3	M	74	≥70	T1N0M0	1		.	0	N0	0	2	high	.		.		28.53	8.23	6.96	7.25
BT095	excluded	>3	M	80	≥70	T1N0M0	1		.	0	N0	0	1	low	.		.		17.63	8.05	7.04	7.28
BT096	included	>3	M	85	≥70	T2N0M0	2	2	T2	0	N0	0	2	high	dead	0	dead	0	15.4	7.72	6.98	7.09	EGFR<8,81	AREG<7,03	EREG<7,36	EGFR<7,89	AREG<7,03	EREG<7,14
BT097	included	>3	F	59	<70	T3bN0M0	3	3	T3/4	0	N0	0	2	high	dead	0	alive	1	48.43	7.77	6.94	7.35	EGFR<8,81	AREG<7,03	EREG<7,36	EGFR<7,89	AREG<7,03	EREG>=7,14
BT098	excluded	>3	F	65	<70	T4N1M1	4	4	T3/4	1	N+	1	1	low	dead	0	dead	0	4.5	8.44	7.04	7.07
BT099	excluded	>3	M	57	<70	TaN0M0	0		.	0	N0	0	1	low	.		.		47.5	7.78	6.95	7.3
BT100	included	>3	M	73	≥70	T2N1M0	2	2	T2	1	N+	0	2	high	dead	0	alive	1	5.23	8.19	7.11	7.25	EGFR<8,81	AREG>=7,03	EREG<7,36	EGFR>=7,89	AREG>=7,03	EREG>=7,14
BT101	included	>3	M	66	<70	T3bN0M0	3	3	T3/4	0	N0	0	2	high	alive	1	alive	1	45.6	7.69	7.1	7.26	EGFR<8,81	AREG>=7,03	EREG<7,36	EGFR<7,89	AREG>=7,03	EREG>=7,14
BT102	included	>3	M	66	<70	T2N0M0	2	2	T2	0	N0	0	2	high	dead	0	dead	0	45.13	8.8	6.81	7.2	EGFR<8,81	AREG<7,03	EREG<7,36	EGFR>=7,89	AREG<7,03	EREG>=7,14
BT103	excluded	>3	M	64	<70	TaN0M0	0		.	0	N0	0	1	low	.		.		43.5	8.39	6.9	7.21
BT104	excluded	>3	M	68	<70	T1N0M0	1		.	0	N0	0	2	high	.		.		44.1	7.88	6.92	7.32
BT105	included	>3	F	59	<70	T2N0M0	2	2	T2	0	N0	0	1	low	alive	1	dead	0	5.93	10.32	7.31	7.2	EGFR>=8,81	AREG>=7,03	EREG<7,36	EGFR>=7,89	AREG>=7,03	EREG>=7,14
BT106	excluded	>3	M	66	<70	T1N0M0	1		.	0	N0	0	2	high	.		.		31.53	8.87	6.86	7.35
BT107	excluded	>3	F	63	<70	T1N0M0	1		.	0	N0	0	1	low	.		.		41.8	8.26	7.01	7.16
BT108	included	>3	M	79	≥70	T2N2M0	2	2	T2	2	N+	0	2	high	dead	0	dead	0	6.5	8.18	6.88	7.13	EGFR<8,81	AREG<7,03	EREG<7,36	EGFR>=7,89	AREG<7,03	EREG<7,14
BT109	excluded	>3	M	44	<70	T1N0M0	1		.	0	N0	0	1	low	.		.		41.07	7.56	7.01	7.09
BT110	included	>3	M	66	<70	T2bN0M0	2	2	T2	0	N0	0	2	high	alive	1	alive	1	39.77	7.93	7.03	7.35	EGFR<8,81	AREG>=7,03	EREG<7,36	EGFR>=7,89	AREG>=7,03	EREG>=7,14
BT111	included	>3	M	61	<70	T2N0M0	2	2	T2	0	N0	0	1	low	alive	1	alive	1	38.97	8.52	6.95	7.28	EGFR<8,81	AREG<7,03	EREG<7,36	EGFR>=7,89	AREG<7,03	EREG>=7,14
BT113	excluded	>3	F	80	≥70	T1N0M0	1		.	0	N0	0	1	low	.		.		31.97	8.58	7.26	7.65
BT114	excluded	>3	M	57	<70	T1N0M0	1		.	0	N0	0	1	low	.		.		37.3	7.88	7.13	7.33
BT115	included	>3	M	55	<70	T2aN0M0	2	2	T2	0	N0	0	1	low	alive	1	alive	1	36.83	7.99	7.15	7.61	EGFR<8,81	AREG>=7,03	EREG>=7,36	EGFR>=7,89	AREG>=7,03	EREG>=7,14
BT116	excluded	>3	M	52	<70	T1N0M0	1		.	0	N0	0	1	low	.		.		36.57	8.06	7.1	7.85
BT117	included	>3	M	50	<70	T2aN0M0	2	2	T2	0	N0	0	2	high	alive	1	alive	1	28.1	7.24	7.05	7.28	EGFR<8,81	AREG>=7,03	EREG<7,36	EGFR<7,89	AREG>=7,03	EREG>=7,14
BT118	included	>3	M	78	≥70	T2N0M0	2	2	T2	0	N0	0	2	high	dead	0	dead	0	3.93	9.28	6.96	7.14	EGFR>=8,81	AREG<7,03	EREG<7,36	EGFR>=7,89	AREG<7,03	EREG>=7,14
BT119	excluded	>3	F	71	≥70	T1N0M0	1		.	0	N0	0	1	low	.		.		23.53	8.24	6.97	7.51
BT120	included	>3	F	81	≥70	T3N0M0	3	3	T3/4	0	N0	0	2	high	dead	0	dead	0	15.1	7.94	7.06	7.21	EGFR<8,81	AREG>=7,03	EREG<7,36	EGFR>=7,89	AREG>=7,03	EREG>=7,14
BT121	excluded	>3	M	43	<70	TaN0M0	0		.	0	N0	0	1	low	.		.		34.87	8.4	7.08	7.05
BT122	included	>3	M	80	≥70	T3N1M0	3	3	T3/4	1	N+	0	2	high	alive	1	alive	1	34.23	8.17	7.09	7.24	EGFR<8,81	AREG>=7,03	EREG<7,36	EGFR>=7,89	AREG>=7,03	EREG>=7,14
BT123	excluded	>3	M	47	<70	TaN0M0	0		.	0	N0	0	1	low	.		.		33.7	8.53	6.93	7.21
BT124	included	>3	M	71	≥70	T4aN0M0	4	4	T3/4	0	N0	0	1	low	dead	0	dead	0	11.07	8.2	7.02	7.37	EGFR<8,81	AREG<7,03	EREG>=7,36	EGFR>=7,89	AREG<7,03	EREG>=7,14
BT125	included	>3	F	73	≥70	T3N0M0	3	3	T3/4	0	N0	0	2	high	dead	0	dead	0	5.77	10.15	7.1	7.35	EGFR>=8,81	AREG>=7,03	EREG<7,36	EGFR>=7,89	AREG>=7,03	EREG>=7,14
BT126	included	>3	M	87	≥70	T2N0M0	2	2	T2	0	N0	0	1	low	alive	1	alive	1	33.07	8.8	6.98	7.04	EGFR<8,81	AREG<7,03	EREG<7,36	EGFR>=7,89	AREG<7,03	EREG<7,14
BT127	excluded	>3	M	67	<70	TaN0M0	0		.	0	N0	0	1	low	.		.		32.87	8.35	6.79	7.18
BT128	included	>3	M	82	≥70	T2N0M0	2	2	T2	0	N0	0	2	high	alive	1	dead	0	9.23	10.19	6.93	7.64	EGFR>=8,81	AREG<7,03	EREG>=7,36	EGFR>=7,89	AREG<7,03	EREG>=7,14
BT129	included	>3	F	78	≥70	T3N1M0	3	3	T3/4	1	N+	0	2	high	dead	0	dead	0	7.1	8.28	6.94	7.88	EGFR<8,81	AREG<7,03	EREG>=7,36	EGFR>=7,89	AREG<7,03	EREG>=7,14
BT130	included	>3	M	60	<70	T2N0M0	2	2	T2	0	N0	0	1	low	alive	1	dead	0	17.13	8.13	6.81	8.38	EGFR<8,81	AREG<7,03	EREG>=7,36	EGFR>=7,89	AREG<7,03	EREG>=7,14
BT131	excluded	>3	M	63	<70	TaN0M0	0		.	0	N0	0	1	low	.		.		23.57	7.82	7.02	7.25
BT132	excluded	>3	M	72	≥70	T1N0M0	1		.	0	N0	0	1	low	.		.		30.7	8.3	7.11	7.2
BT133	excluded	>3	M	68	<70	T1N0M0	1		.	0	N0	0	2	high	.		.		30.1	9.91	6.99	7.83
BT134	excluded	>3	M	64	<70	T1N0M0	1		.	0	N0	0	1	low	.		.		29.73	7.86	6.87	7.29
BT135	excluded	>3	M	83	≥70	T1N0M0	1		.	0	N0	0	1	low	.		.		15.43	8.41	7	7.33
BT136	excluded	>3	M	66	<70	T1N0M0	1		.	0	N0	0	1	low	.		.		29.37	8.48	6.97	7.25
BT137	excluded	>3	M	68	<70	T1N0M0	1		.	0	N0	0	1	low	.		.		17.67	7.86	6.9	6.96
BT138	excluded	>3	M	63	<70	T1N0M0	1		.	0	N0	0	1	low	.		.		28.47	7.74	7.01	6.93
BT139	excluded	>3	F	45	<70	T1N0M0	1		.	0	N0	0	1	low	.		.		23.9	7.24	7.06	7.6
BT140	excluded	>3	M	84	≥70	T1N0M0	1		.	0	N0	0	1	low	.		.		23.57	8.16	7.25	7.41
BT141	excluded	>3	M	72	≥70	T1N0M0	1		.	0	N0	0	2	high	.		.		13.93	7.83	7.05	7.07
BT142	excluded	≤3	F	72	≥70	TaN3M1	0		.	3	N+	1	2	high	dead	0	dead	0	2.13	8.41	7.13	7.15
BT143	included	>3	M	66	<70	T2N0M0	2	2	T2	0	N0	0	2	high	alive	1	alive	1	22.27	7.46	7.03	7.1	EGFR<8,81	AREG>=7,03	EREG<7,36	EGFR<7,89	AREG>=7,03	EREG<7,14
BT144	excluded	>3	M	74	≥70	T4N0M1	4	4	T3/4	0	N0	1	1	low	alive	1	dead	0	6.87	8.66	6.92	7.37
BT145	excluded	>3	M	63	<70	T1N0M0	1		.	0	N0	0	1	low	.		.		20.83	7.84	7	7.14
BT146	excluded	>3	M	58	<70	T1N0M0	1		.	0	N0	0	1	low	.		.		21.63	7.91	6.95	6.99
BT147	excluded	>3	M	70	≥70	TaN0M0	0		.	0	N0	0	1	low	.		.		21.4	7.81	6.94	6.99
BT148	excluded	>3	M	40	<70	T1N0M0	1		.	0	N0	0	1	low	.		.		57.87	7.73	6.97	7.14
BT149	excluded	>3	F	80	≥70	T1N0M0	1		.	0	N0	0	2	high	.		.		21.23	8.84	6.96	7.13
BT150	excluded	>3	F	62	<70	TaN0M0	0		.	0	N0	0	1	low	.		.		21.23	8.25	6.88	7.23
BT151	excluded	>3	M	24	<70	T1N0M0	1		.	0	N0	0	1	low	.		.		20.47	8.26	6.88	7.35
BT152	excluded	>3	M	45	<70	T1N0M0	1		.	0	N0	0	2	high	.		.		20.4	7.68	6.93	7.09
BT153	excluded	>3	F	67	<70	TaN0M0	0		.	0	N0	0	1	low	.		.		19	7.87	6.95	7.58
BT154	included	>3	M	65	<70	T2N0M0	2	2	T2	0	N0	0	2	high	alive	1	alive	1	79.3	9.91	7.05	7.12	EGFR>=8,81	AREG>=7,03	EREG<7,36	EGFR>=7,89	AREG>=7,03	EREG<7,14
BT155	included	>3	F	59	<70	T4N1M0	4	4	T3/4	1	N+	0	2	high	dead	0	dead	0	15.47	8.99	7.01	7.24	EGFR>=8,81	AREG<7,03	EREG<7,36	EGFR>=7,89	AREG<7,03	EREG>=7,14
BT156	excluded	>3	M	64	<70	T2N1M1	2	2	T2	1	N+	1	2	high	dead	0	dead	0	26.43	7.7	6.99	7.17
BT157	included	>3	M	70	≥70	T4N0M0	4	4	T3/4	0	N0	0	2	high	dead	0	dead	0	13.27	7.88	6.95	7.2	EGFR<8,81	AREG<7,03	EREG<7,36	EGFR<7,89	AREG<7,03	EREG>=7,14
BT158	included	>3	M	66	<70	T3NxM0	3	3	T3/4	x	.	0	2	high	dead	0	dead	0	6.4	9.14	6.87	7.79	EGFR>=8,81	AREG<7,03	EREG>=7,36	EGFR>=7,89	AREG<7,03	EREG>=7,14
BT159	included	>3	M	77	≥70	T4aN0M0	4	4	T3/4	0	N0	0	2	high	alive	1	alive	1	10.67	8.64	7.13	7.23	EGFR<8,81	AREG>=7,03	EREG<7,36	EGFR>=7,89	AREG>=7,03	EREG>=7,14
BT160	included	>3	M	67	<70	T2N2M0	2	2	T2	2	N+	0	1	low	alive	1	alive	1	18.13	8.66	6.91	7.13	EGFR<8,81	AREG<7,03	EREG<7,36	EGFR>=7,89	AREG<7,03	EREG<7,14
BT161	included	>3	M	51	<70	T3aN0M0	3	3	T3/4	0	N0	0	1	low	alive	1	alive	1	15.37	8.78	7.15	7.07	EGFR<8,81	AREG>=7,03	EREG<7,36	EGFR>=7,89	AREG>=7,03	EREG<7,14
BT162	included	>3	M	42	<70	T4N2M0	4	4	T3/4	2	N+	0	2	high	dead	0	alive	1	11.8	8.37	7.07	7.39	EGFR<8,81	AREG>=7,03	EREG>=7,36	EGFR>=7,89	AREG>=7,03	EREG>=7,14
BT163	included	>3	M	72	≥70	T2N0M0	2	2	T2	0	N0	0	2	high	alive	1	alive	1	10.87	8.76	6.9	7.09	EGFR<8,81	AREG<7,03	EREG<7,36	EGFR>=7,89	AREG<7,03	EREG<7,14
BT164	included	>3	F	70	≥70	T2N0M0	2	2	T2	0	N0	0	1	low	dead	0	dead	0	10.03	7.78	7	8.52	EGFR<8,81	AREG<7,03	EREG>=7,36	EGFR<7,89	AREG<7,03	EREG>=7,14
BT165	excluded	>3	M	54	<70	T1N0M0	1		.	0	N0	0	1	low	.		.		6.73	7.63	7.09	7.16
BT166	included	>3	M	62	<70	T2aN0M0	2	2	T2	0	N0	0	2	high	alive	1	alive	1	5.3	8.13	6.98	7.43	EGFR<8,81	AREG<7,03	EREG>=7,36	EGFR>=7,89	AREG<7,03	EREG>=7,14
